# Supplementary material for: Riemerella anatipestifer AS87_RS09170 gene is responsible for biotin synthesis, bacterial morphology and virulence
Source: PubMed Central journal article supplement (PMC6168606; doi:10.1038/s41598-018-32905-1), 2018-10-02
Supplement: 41598_2018_32905_MOESM1_ESM.pdf [file 41598_2018_32905_MOESM1_ESM.pdf]

## Supplementary Information

### ***Riemerella anatipestifer* AS87\_RS09170 gene is responsible for biotin synthesis, bacterial morphology and virulence**

Xiaomei Ren<sup>1,\*</sup>, Xiaolan Wang<sup>1,\*</sup>, Huoying Shi<sup>2</sup>, Xuemei Zhang<sup>1</sup>, Zongchao Chen<sup>1</sup>,  
Kanwar Kumar Malhi<sup>1</sup>, Chan Ding<sup>1,3</sup> and Shengqing Yu<sup>1,3\*</sup>

<sup>1</sup>Shanghai Veterinary Research Institute, Chinese Academy of Agricultural Sciences  
(CAAS), Shanghai, China

<sup>2</sup>College of Veterinary Medicine, Yangzhou University, Yangzhou, Jiangsu, China

<sup>3</sup>Jiangsu Co-innovation Center for Prevention and Control of Important Animal  
Infectious Diseases and Zoonosis, Yangzhou, Jiangsu, China

Corresponding authors: Prof Shengqing Yu, E-mail: [yus@shvri.ac.cn](mailto:yus@shvri.ac.cn).

\*X.R. and X.W. contributed equally to this work.

**Supplementary Figure S1. The putative biotin biosynthetic pathway in *R. anatipestifer*.** Pimeloyl-[acp] was synthesized from malonyl-CoA through the fatty acid biosynthetic pathway in *R. anatipestifer*. The subsequent four steps utilizing BioF, BioA, BioD and BioB for biotin synthesis are conserved in all organisms. BioF can accept either pimeloyl-[acp] or pimeloyl-CoA as a substrate. This pathway is proposed to exist in *R. anatipestifer* due to the presence of putative FabD, FabF, FabG, FabZ and FabI, and absence of BioI and BioW homologues in the *R. anatipestifer* genome. Abbreviations: CoA, Coenzyme A; acp, acyl carrier protein; FabD, [acp] S-malonyltransferase; FabF, 3-oxoacyl-[acp] synthase II; FabG; 3-oxoacyl-[acp] reductase; FabZ, 3-hydroxyacyl-[acp] dehydratase; FabI, enoyl-[acp] reductase; BioF, 8-amino-7-oxononanoate synthase; BioA, adenosylmethionine-8-amino-7-oxononanoate aminotransferase; BioD, dethiobiotin synthetase; BioB, biotin synthase.

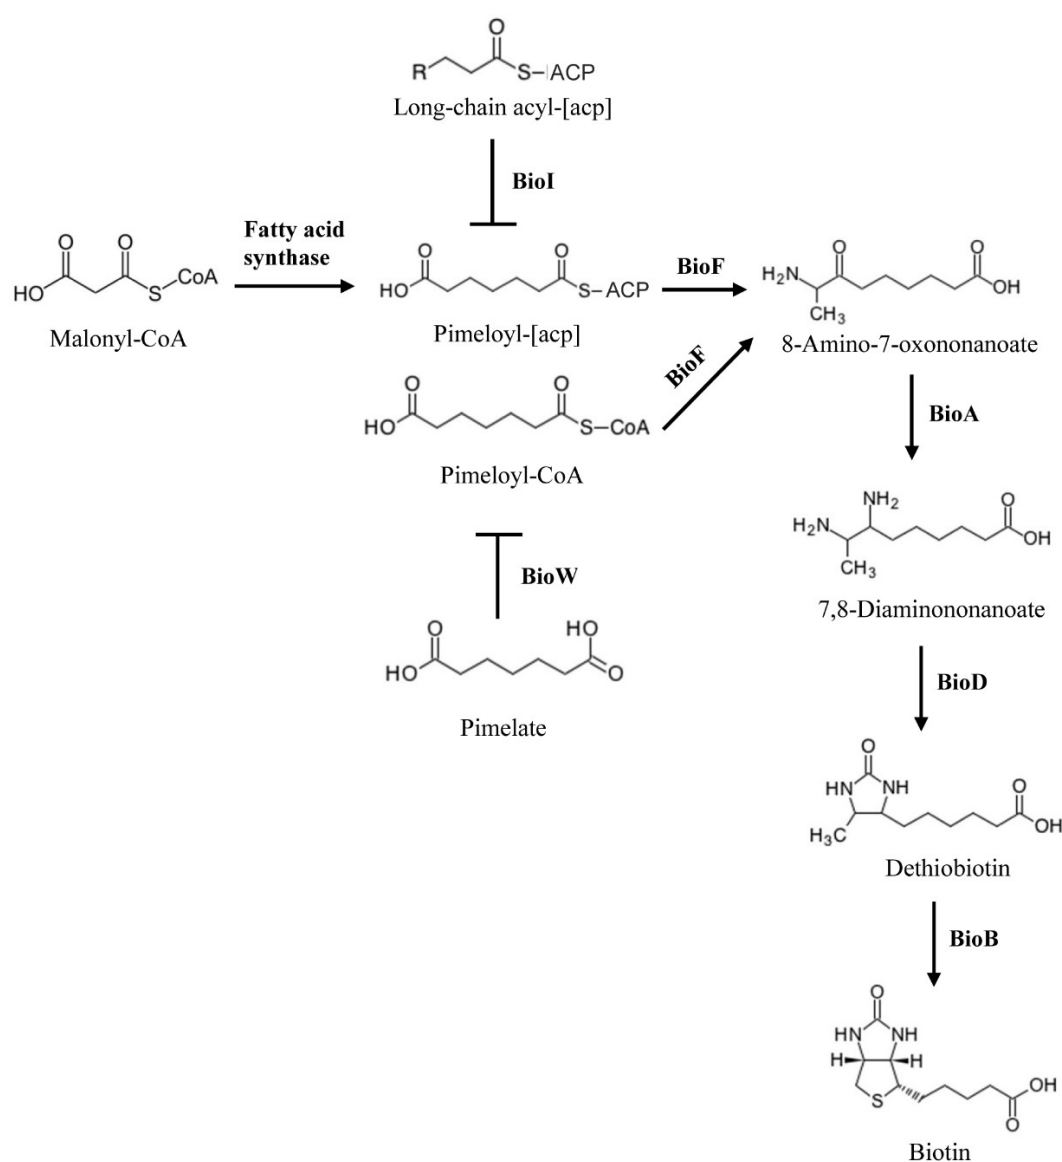

**Supplementary Figure S2. The uncropped image of PCR analyses of *R. anatipestifer* AS87\_RS09170 gene. The cropped image was labeled in red frame.**

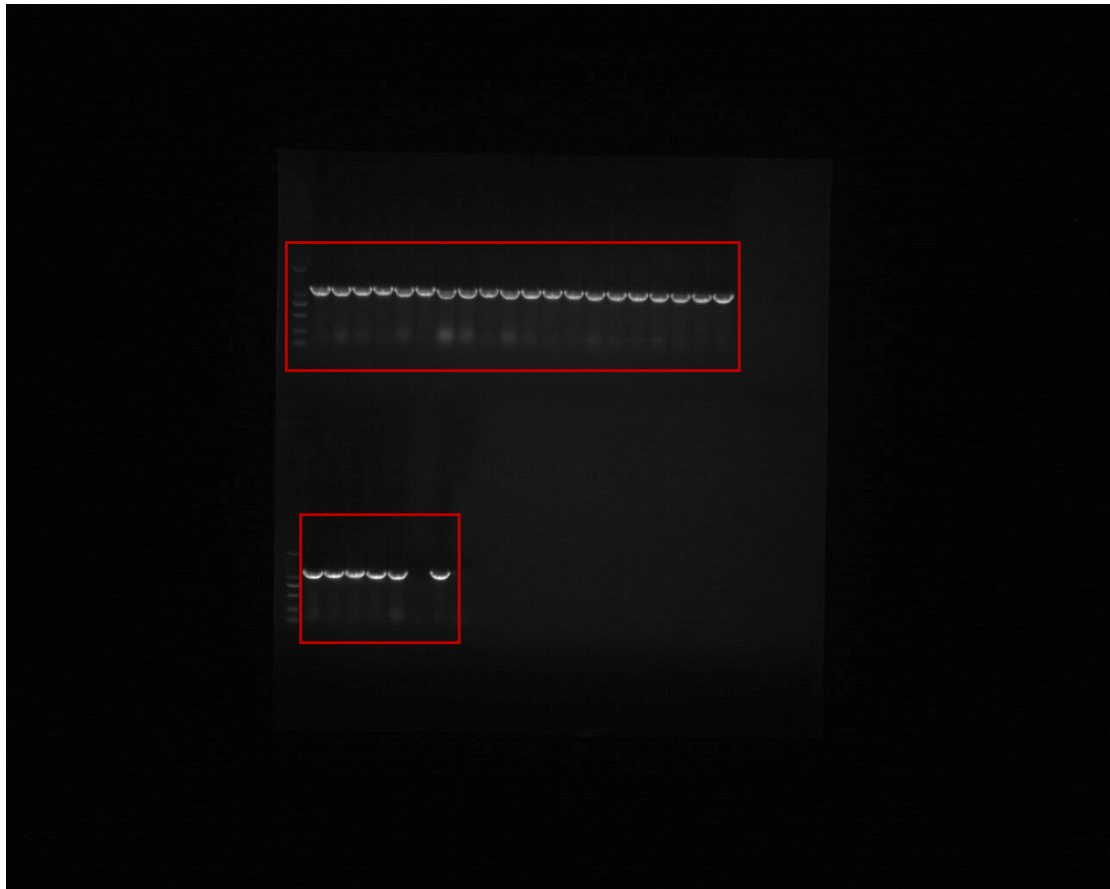

**Supplementary Figure S3. Immunoblot analysis of the biotinylated protein.**

The cropped blots correspond to GroEL were labeled in red frame of row A; the cropped blots correspond to biotinylated proteins were labeled in red frame of row B.

**A**

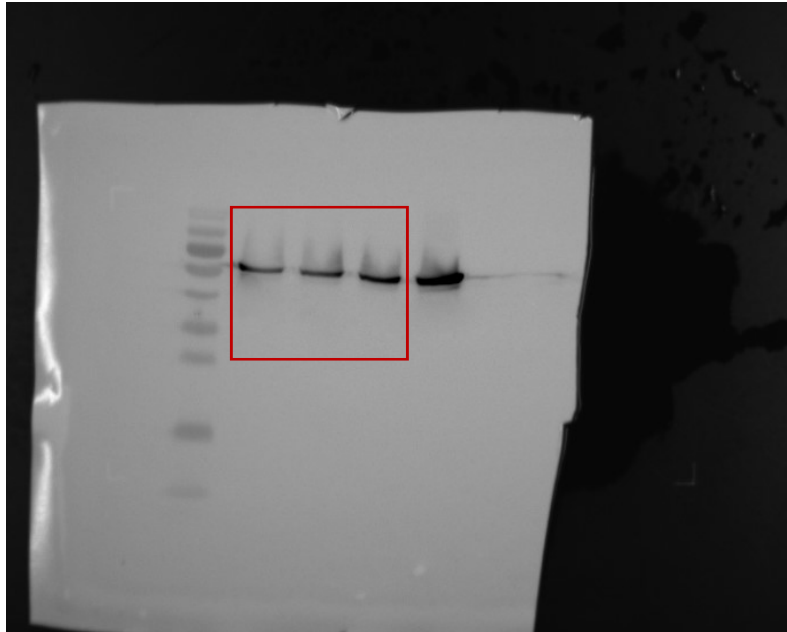

**B**

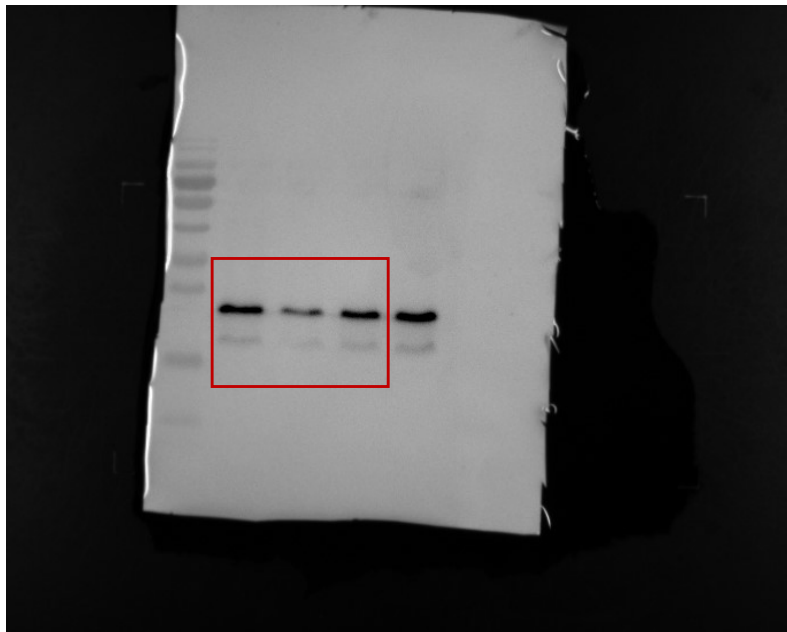

**Supplementary Figure S4. Analysis of membrane proteins.** The cropped gel was labeled in red box.

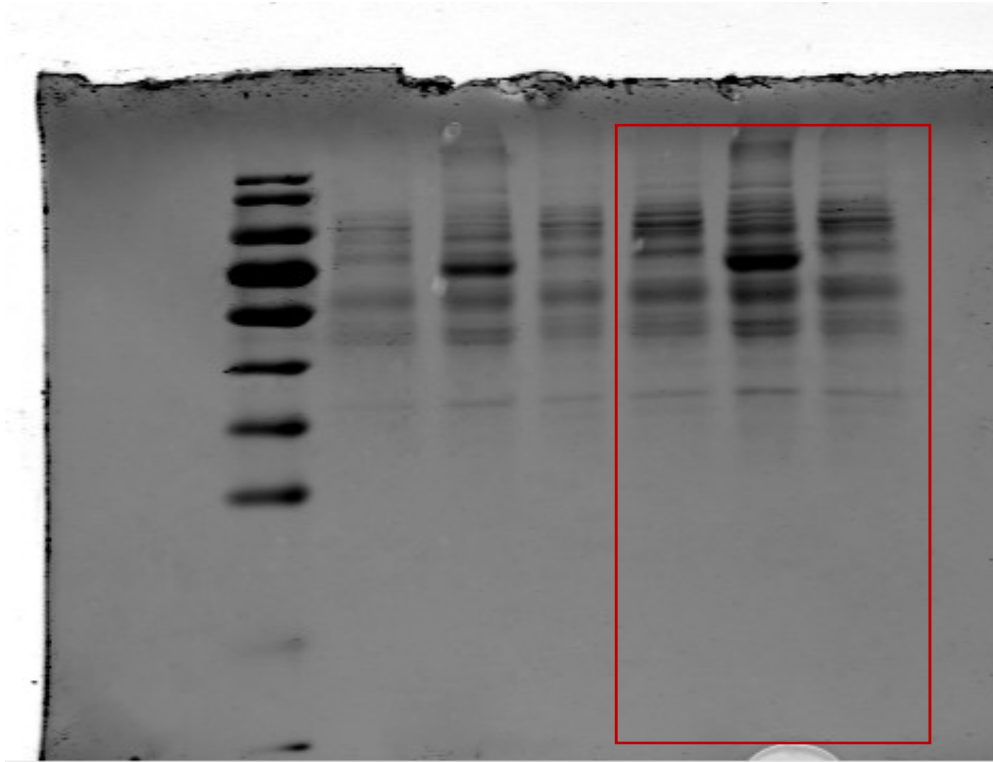

**Supplementary Table S1. Primers used for qPCR analysis**

| Gene locus <sup>a</sup> | Forward primer sequences (5' - 3') | Reverse primer sequences (5' - 3') | Products (bp) |
|-------------------------|------------------------------------|------------------------------------|---------------|
| AS87_RS05800            | TTACAACGCATTGAAAGCAGA              | TGGCACTATAAGCTGTGAGGAA             | 184           |
| AS87_RS04150            | CGTGCTAAGAGCTACGATGG               | GGGCGAAGATCTCCTTTTTTC              | 183           |
| AS87_RS04120            | AATGATGGATGGAGCCAAAG               | CAATCCTGAGTCAAATTCCGTA             | 434           |
| AS87_RS09460            | GCATCCTGCAGTTGCTTTTA               | TTCTGCTTTTCTTGGGTGCT               | 244           |
| AS87_RS09445            | GCATCCTGCAGTTGCTTTTA               | TTCTGCTTTTCTTGGGTGCT               | 244           |
| AS87_RS03745            | TTTGGGTCCTAGGCTGAATG               | AAAAGCCTTCTACCCCAAACCTC            | 194           |
| AS87_RS05725            | TCTCCGCGACTTTGTTTTCT               | GTCGCTACCATCTGGGTGAT               | 179           |
| AS87_RS05655            | AGATGGAAGTGGCATTGCTC               | CTTGCTCCTCAAACCTTCG                | 230           |
| AS87_RS02380            | CGTATCATTGGAACGCTCT                | AGGGACAATGTTGGCTTTTG               | 197           |
| AS87_RS06190            | CATTATCGCCCTAGCAAAGC               | TTACCAGAAGCGGTGTCTCC               | 216           |
| AS87_RS03960            | AAAAGGAATCCACCCTGAAAA              | CCAGTGTAGAATGGGTGAGAAG             | 174           |
| AS87_RS01395            | AAAACCTTTGGGGGCAATTCT              | GATAACAGCGTTCGGCATT                | 241           |
| AS87_RS10270            | GCGGACAAAATTCTCCCTTT               | ATCCGAAGTCCAAGCATTG                | 183           |
| AS87_RS02825            | CCGAGGACGAAAACCATTTA               | TGGCTACTTGCTGTGCAAAC               | 150           |
| AS87_RS07030            | GGAGAAAGACCTTGGGGAAA               | TTTGAGCCAAGGGGTATGAG               | 218           |
| AS87_RS10115            | TTTGGGACGATAAACATTTTCC             | TTTTCAAGTGGGAGATGATG               | 154           |
| AS87_RS01890            | AACGGTCTTGCAGTGGTAGG               | TCTTCAATCACCAAATCGTCA              | 158           |
| AS87_RS10350            | AGCTCTACCTCCGTTACCA                | TTCTTCTCATTGGTGCATCT               | 159-          |
| AS87_RS06890            | GCGTTTGGGCAGGATATAGA               | AAAAGTGCATCTCCTCCTTCA              | 161           |
| AS87_RS02260            | AGGTGCCAGAGTTTGAGCAT               | TCGTCCCATAGTTCCTGTCC               | 172           |
| AS87_RS01190            | TGGAAAATCACATTTAATCAACG            | TGGTTTTGCTCTCCTGCTTC               | 151           |
| AS87_RS00965            | TCCCTGAATTCAAAGCTGGT               | CATCGCCACTCATTTTTCTG               | 153           |
| AS87_RS05265            | CGAGCAAATAAATGCGGAAA               | CGGAAATAAACTTCGCCATC               | 189           |
| AS87_RS09430            | ATGGAGCGGAAAAACACATT               | CACCCATTGGTAAAGGGAAA               | 150           |
| AS87_RS07650            | ATGGCAAATCATAAATCAGCA              | CTTAGGCAATTGCTCTGATGC              | 150           |
| AS87_RS00160            | TAGTGGGCGGTTTTTCAATC               | GCCTCCTGTATGCTTTTGC                | 229           |
| AS87_RS08680            | TACCACAGGAGCACAGCAAG               | AAGCGTTGGCTTCATACGAT               | 239           |
| AS87_RS02480            | GGTTTTGGCATTTCCCTTTT               | CGGGTTTTATACGCTCCAAA               | 161           |
| AS87_RS09175            | AGAGGCTTTAGGAGCCGATT               | CACACCACCTGCACCTTCTA               | 244           |
| AS87_RS01370            | GAGCAGCTGTATTGGGTGCT               | TATTCTCCCCTGCCATAGA                | 151           |
| AS87_RS07305            | AAAACCGGGGGAAACAGTAG               | CCACTCAGGCACTGGAGTTT               | 220           |
| AS87_RS01365            | GGGTTAGTGCGATTTGTGGT               | CTCCCAAAAAGACAGCAGGA               | 207           |
| AS87_RS01360            | GGAGCTTCGTTTTGTCTTGC               | CCTTGTGGCGGAACATCTAT               | 196           |
| AS87_RS01355            | CGCAGAAAACTTAAGGCACA               | GCAAGTCTAGCCATTTCCACA              | 234           |
| AS87_RS01350            | CGAAGTTTTTCTCGCTTTGG               | TAACGGTGCTCGTAGCCTTT               | 218           |
| AS87_RS10025            | ATCACCCAAGCGATTGAAAG               | TGGATTTGGCTCAGGATTTC               | 186           |
| AS87_RS07820            | TACCACTCCGATGGCTACC                | TCCCATAGCCTCATACTGG                | 238           |
| AS87_RS09180            | GTTTTGGCGGAAACGATTTA               | CACCGCCGTAGAACCATTAT               | 162           |
| AS87_RS09185            | GCGGTGGAAAAGCAGTATTC               | GCATCTAAAAGCCCTCCTGTT              | 164           |

<sup>a</sup> Based on *R. anatipestifer* Yb2 genome (accession number: CP007204).

**Supplementary Table S2 Different expressed protein of mutant strain Yb2ΔbioF identified by Liquid Chromatography (LC)-Electrospray Ionization (ESI) Tandem MS (MS/MS)**

| <b>Accession no.</b> | <b>Protein name</b>                 | <b>Subcellular location<sup>a</sup></b> |
|----------------------|-------------------------------------|-----------------------------------------|
| AKQ39270             | endothelin-converting protein       | Cytoplasmic                             |
| AKQ40024             | peptidase S46                       | Cytoplasmic                             |
| AKQ39536             | succinate dehydrogenase             | Cytoplasmic Membrane                    |
| AKQ40081             | ABC transporter ATP-binding protein | Cytoplasmic                             |
| AKQ38971             | threonyl-tRNA synthetase            | Cytoplasmic                             |
| AKQ38866             | peptidase S8                        | Cytoplasmic                             |
| AKQ39160             | glutamate--tRNA ligase              | Cytoplasmic                             |
| AKQ40412             | hypothetical protein AS87_08865     | Cytoplasmic                             |
| AKQ40494             | pyruvate dehydrogenase              | Cytoplasmic                             |
| AKQ39187             | molecular chaperone DnaK            | Cytoplasmic                             |
| AKQ40079             | hypothetical protein                | Cytoplasmic                             |
| AKQ39439             | phosphoglucomutase                  | Cytoplasmic                             |
| AKQ38925             | asparagine synthetase B             | Cytoplasmic                             |
| AKQ40192             | urease subunit alpha                | Cytoplasmic                             |
| AKQ38988             | GTP-binding protein TypA            | Cytoplasmic                             |
| AKQ39014             | 30S ribosomal protein S1            | Cytoplasmic                             |
| AKQ40083             | membrane protein                    | Outer Membrane                          |
| AKQ39944             | ribonuclease R                      | Cytoplasmic                             |
| AKQ39296             | peptidase M3                        | Cytoplasmic                             |
| AKQ39451             | Xaa-Pro aminopeptidase              | Cytoplasmic                             |
| AKQ39970             | aminopeptidase                      | Unknown                                 |
| AKQ39114             | peptidase S46                       | Cytoplasmic                             |
| AKQ39755             | TonB-dependent receptor             | Outer Membrane                          |
| AKQ39984             | elongation factor 4                 | Cytoplasmic Membrane                    |
| AKQ39047             | DNA gyrase subunit B                | Cytoplasmic                             |
| AKQ39656             | glycoside hydrolase                 | Cytoplasmic                             |
| AKQ40119             | peptidylprolyl isomerase            | Periplasmic                             |
| AKQ39883             | peptidase M41                       | Cytoplasmic Membrane                    |
| AKQ39061             | 2-oxoglutarate dehydrogenase        | Cytoplasmic                             |
| AKQ40395             | glutamine amidotransferase          | Cytoplasmic                             |
| AKQ38983             | lysyl-tRNA synthetase               | Cytoplasmic                             |
| AKQ40550             | aconitate hydratase                 | Cytoplasmic                             |
| AKQ39348             | polynucleotide phosphorylase        | Cytoplasmic                             |
| AKQ39527             | arginyl-tRNA synthetase             | Cytoplasmic                             |
| AKQ40394             | hypothetical protein AS87_08775     | Outer Membrane                          |
| AKQ39033             | dipeptidyl carboxypeptidase II      | Cytoplasmic                             |
| AKQ39771             | preprotein translocase subunit SecA | Cytoplasmic                             |

|          |                                                             |                      |
|----------|-------------------------------------------------------------|----------------------|
| AKQ39501 | asparagine synthase                                         | Cytoplasmic          |
| AKQ39124 | AMP-dependent synthetase<br>tRNA uridine 5-                 | Cytoplasmic Membrane |
| AKQ40011 | carboxymethylaminomethyl modification<br>protein            | Cytoplasmic          |
| AKQ39642 | malic enzyme                                                | Cytoplasmic          |
| AKQ40166 | hypothetical protein AS87_07530                             | Unknown              |
| AKQ40159 | leucyl-tRNA synthetase                                      | Cytoplasmic          |
| AKQ38946 | formate--tetrahydrofolate ligase                            | Cytoplasmic          |
| AKQ39828 | TonB-dependent receptor                                     | Unknown              |
| AKQ39103 | phenylalanyl-tRNA synthetase subunit beta                   | Cytoplasmic          |
| AKQ39505 | asparagine synthase                                         | Cytoplasmic          |
| AKQ38848 | ATP-dependent DNA helicase RecQ                             | Cytoplasmic          |
| AKQ39796 | DNA replication protein RecF                                | Cytoplasmic          |
| AKQ38936 | peptidase M16                                               | Unknown              |
| AKQ39988 | isoleucyl-tRNA synthase                                     | Cytoplasmic          |
| AKQ39112 | transketolase                                               | Cytoplasmic          |
| AKQ40669 | hypothetical protein AS87_10250                             | Unknown              |
| AKQ39605 | elongation factor Tu                                        | Cytoplasmic          |
| AKQ39119 | methionyl-tRNA synthetase                                   | Cytoplasmic          |
| AKQ38954 | DNA topoisomerase IV subunit B                              | Cytoplasmic          |
| AKQ39138 | 2-oxoglutarate dehydrogenase                                | Cytoplasmic          |
| AKQ39812 | translation initiation factor IF-2                          | Cytoplasmic          |
| AKQ38954 | DNA topoisomerase IV subunit B                              | Cytoplasmic          |
| AKQ38924 | aspartyl-tRNA synthetase                                    | Cytoplasmic          |
| AKQ39593 | DNA-directed RNA polymerase subunit<br>beta                 | Cytoplasmic          |
| AKQ38911 | TonB-dependent receptor                                     | Outer Membrane       |
| AKQ39740 | fumarate hydratase                                          | Cytoplasmic          |
| AKQ39940 | Clp protease ClpC                                           | Cytoplasmic          |
| AKQ38789 | catalase                                                    | Unknown              |
| AKQ39732 | peroxidase                                                  | Cytoplasmic          |
| AKQ40305 | alanyl-tRNA synthetase                                      | Cytoplasmic          |
| AKQ38951 | ribonuclease                                                | Cytoplasmic          |
| AKQ39298 | membrane protein                                            | Outer Membrane       |
| AKQ39918 | quinol:cytochrome C oxidoreductase                          | Unknown              |
| AKQ40246 | peptidase M16                                               | Outer Membrane       |
| AKQ39589 | ABC transporter                                             | Cytoplasmic          |
| AKQ40473 | peptidase S9                                                | Unknown              |
| AKQ39688 | catalase                                                    | Periplasmic          |
| AKQ39388 | hypothetical protein AS87_03385                             | Cytoplasmic          |
| AKQ39618 | bifunctional cbb3-type cytochrome c<br>oxidase subunit I/II | Cytoplasmic          |
| AKQ39926 | peptidoglycan glycosyltransferase                           | Cytoplasmic Membrane |



|          |                                                                       |                      |
|----------|-----------------------------------------------------------------------|----------------------|
| AKQ39592 | DNA-directed RNA polymerase subunit beta'                             | Cytoplasmic          |
| AKQ38812 | acyl-CoA dehydrogenase                                                | Cytoplasmic          |
| AKQ39486 | prolyl tripeptidyl peptidase                                          | Unknown              |
| AKQ39444 | valyl-tRNA synthetase                                                 | Cytoplasmic          |
| AKQ40043 | hypothetical protein                                                  | Cytoplasmic          |
| AKQ39981 | cysteine desulfurase                                                  | Cytoplasmic          |
| AKQ39198 | dihydrolipoamide dehydrogenase                                        | Cytoplasmic          |
| AKQ39125 | peptide chain release factor 3                                        | Cytoplasmic          |
| AKQ38846 | gliding motility protein GldG                                         | Unknown              |
| AKQ39839 | glutamine synthetase                                                  | Cytoplasmic          |
| AKQ39153 | hypothetical protein                                                  | Outer Membrane       |
| AKQ39462 | glycine dehydrogenase                                                 | Cytoplasmic          |
| AKQ39948 | TonB-dependent receptor                                               | Outer Membrane       |
| AKQ39968 | histidine kinase                                                      | Unknown              |
| AKQ39809 | hypothetical protein                                                  | Outer Membrane       |
| AKQ39137 | 2-oxoglutarate dehydrogenase                                          | Cytoplasmic          |
| AKQ40290 | ribonucleotide-diphosphate reductase subunit alpha                    | Cytoplasmic          |
| AKQ38865 | RNA polymerase sigma24 factor                                         | Cytoplasmic          |
| AKQ40353 | hypothetical protein                                                  | Cytoplasmic Membrane |
| AKQ40201 | gliding motility protein                                              | Outer Membrane       |
| AKQ38943 | phosphate starvation protein PhoH                                     | Cytoplasmic          |
| AKQ38978 | phosphoribosylformylglycinamide synthase                              | Cytoplasmic          |
| AKQ39310 | DNA mismatch repair protein MutS                                      | Cytoplasmic          |
| AKQ40244 | recombinase RecJ                                                      | Cytoplasmic          |
| AKQ40435 | hypothetical protein AS87_08980                                       | Cytoplasmic          |
| AKQ38939 | DNA polymerase I                                                      | Cytoplasmic          |
| AKQ39232 | 5-methyltetrahydropteroyltriglutamate--homocysteine methyltransferase | Cytoplasmic          |
| AKQ40583 | hypothetical protein                                                  | Cytoplasmic          |
| AKQ40066 | phospho-N-acetylmuramoyl-pentapeptide-transferase                     | Cytoplasmic Membrane |
| AKQ39325 | NifR3 family TIM-barrel protein                                       | Cytoplasmic          |
| AKQ39331 | peptidase M1                                                          | Cytoplasmic          |
| AKQ40443 | serine dehydratase                                                    | Cytoplasmic          |
| AKQ38958 | Na(+)/H(+) antiporter NhaA                                            | Cytoplasmic Membrane |
| AKQ38976 | 3-hydroxybutyryl-CoA dehydrogenase                                    | Cytoplasmic          |
| AKQ39903 | protease 2                                                            | Periplasmic          |
| AKQ39452 | 1-pyrroline-5-carboxylate dehydrogenase                               | Cytoplasmic          |
| AKQ40265 | Clp protease ClpB                                                     | Cytoplasmic          |
| AKQ39635 | hypothetical protein AS87_04735                                       | Cytoplasmic Membrane |
| AKQ40379 | translation factor Sua5                                               | Unknown              |

|          |                                                              |                      |
|----------|--------------------------------------------------------------|----------------------|
| AKQ39516 | glucose-6-phosphate isomerase                                | Cytoplasmic          |
| AKQ39843 | histidine kinase                                             | Cytoplasmic Membrane |
| AKQ39612 | pseudouridine synthase                                       | Cytoplasmic          |
| AKQ39862 | excinuclease ABC subunit B                                   | Cytoplasmic          |
| AKQ39736 | glycyl-tRNA synthetase                                       | Cytoplasmic          |
| AKQ39010 | phosphoribosylaminoimidazolecarboxamide<br>formyltransferase | Cytoplasmic          |
| AKQ38930 | membrane protein                                             | Cytoplasmic Membrane |
| AKQ39100 | molecular chaperone GroEL                                    | Cytoplasmic          |
| AKQ38932 | isocitrate dehydrogenase                                     | Cytoplasmic          |
| AKQ39532 | CTP synthetase                                               | Cytoplasmic          |
| AKQ39807 | amino acid ABC transporter substrate-<br>binding protein     | Cytoplasmic          |
| AKQ39086 | preprotein translocase subunit SecD                          | Cytoplasmic Membrane |
| AKQ40007 | phosphoenolpyruvate carboxykinase                            | Cytoplasmic          |
| AKQ39811 | TonB-dependent receptor                                      | Outer Membrane       |
| AKQ39719 | elongation factor G                                          | Cytoplasmic          |
| AKQ38777 | alpha-glucosidase                                            | Unknown              |
| AKQ40273 | prolyl endopeptidase                                         | Periplasmic          |

<sup>a</sup>Subcellular locations were predicted by the PSORTb v.3.0.2 software (<http://www.psort.org/>).
